# Supplementary material for: Molecular heterogeneity analysis of poly(amidoamine) dendrimer-based mono- and multifunctional nanodevices by capillary electrophoresis
Source: Royal Society of Chemistry journal article supplement (doi:10.1039/b515624f), 2006-01-01
Supplement: b515624f.pdf [file b515624f.pdf]

## Supporting Information

### Molecular heterogeneity analysis of poly(amidoamine) dendrimer-based mono- and multifunctional nanodevices by capillary electrophoresis

Xiangyang Shi, István J. Majoros, Anil K. Patri, Xiangdong Bi, Mohammad T. Islam, Ankur Desai, T. Rose Ganser, James R. Baker, Jr\*  
Michigan Nanotechnology Institute for Medicine and Biological Sciences,  
University of Michigan, Ann Arbor, MI 48109

A deconvoluted normalized electropherogram of G5.NH<sub>2</sub>-FA conjugates (Figure S1a). In Figure S1a, Observed and Generated curves are the original data file and generated data file using Peakfit software, respectively. Figure S1b shows the UV-Vis spectrum analysis of Peak 1 (top panel) and Peak 3 (bottom panel) shown in Figure S1a.

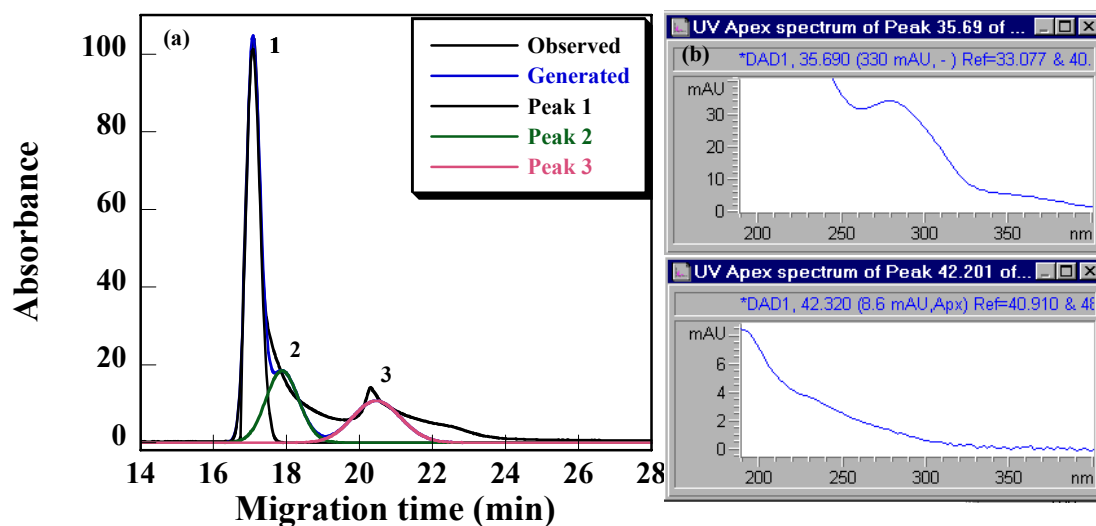

Figure S1
